# Supplementary material
Source: PubMed Central journal article supplement (PMC4047818)
Supplement: bi500073z_si_002.pdf [file bi500073z_si_002.pdf]

## Supporting information

for

### An insight into structural and biological relevance of the T/R transition of the B-chain N-terminus in human insulin

Lucie Kosinová<sup>‡</sup>, Václav Veverka<sup>‡</sup>, Pavlína Novotná<sup>†</sup>, Michaela Collinsová<sup>‡</sup>, Marie Urbanová<sup>†</sup>, Nicholas R. Moody<sup>§</sup>, Johan P. Turkenburg<sup>§</sup>, Jiří Jiráček<sup>‡</sup>, Andrzej M. Brzozowski<sup>§</sup> and Lenka Žáková<sup>‡\*</sup>

<sup>‡</sup> Institute of Organic Chemistry and Biochemistry, Academy of Sciences of the Czech Republic, v.v.i., Flemingovo nám 2, 166 10 Prague 6, Czech Republic

<sup>†</sup> Department of Analytical Chemistry and Department of Physics and Measurements, Institute of Chemical Technology, Prague, Technická 5, 166 28 Prague 6, Czech Republic

<sup>§</sup> York Structural Biology Laboratory, Department of Chemistry, the University of York, Heslington, York, YO10 5YW, United Kingdom

\* To whom correspondence may be addressed: zakova@uochb.cas.cz.

#### Table of Contents

|                                                                                 |    |
|---------------------------------------------------------------------------------|----|
| Figure S1                                                                       | 2  |
| Table S1                                                                        | 3  |
| Figure S2                                                                       | 4  |
| Determination of receptor binding affinity for the isoform B of human IR (IR-B) | 5  |
| Determination of receptor binding affinity for human IGF-1 receptor (IGF-1R)    | 5  |
| Figure S3                                                                       | 6  |
| Table S2                                                                        | 6  |
| Figure S4                                                                       | 7  |
| Table S3                                                                        | 8  |
| Table S4                                                                        | 9  |
| Table S5                                                                        | 10 |
| References                                                                      | 11 |

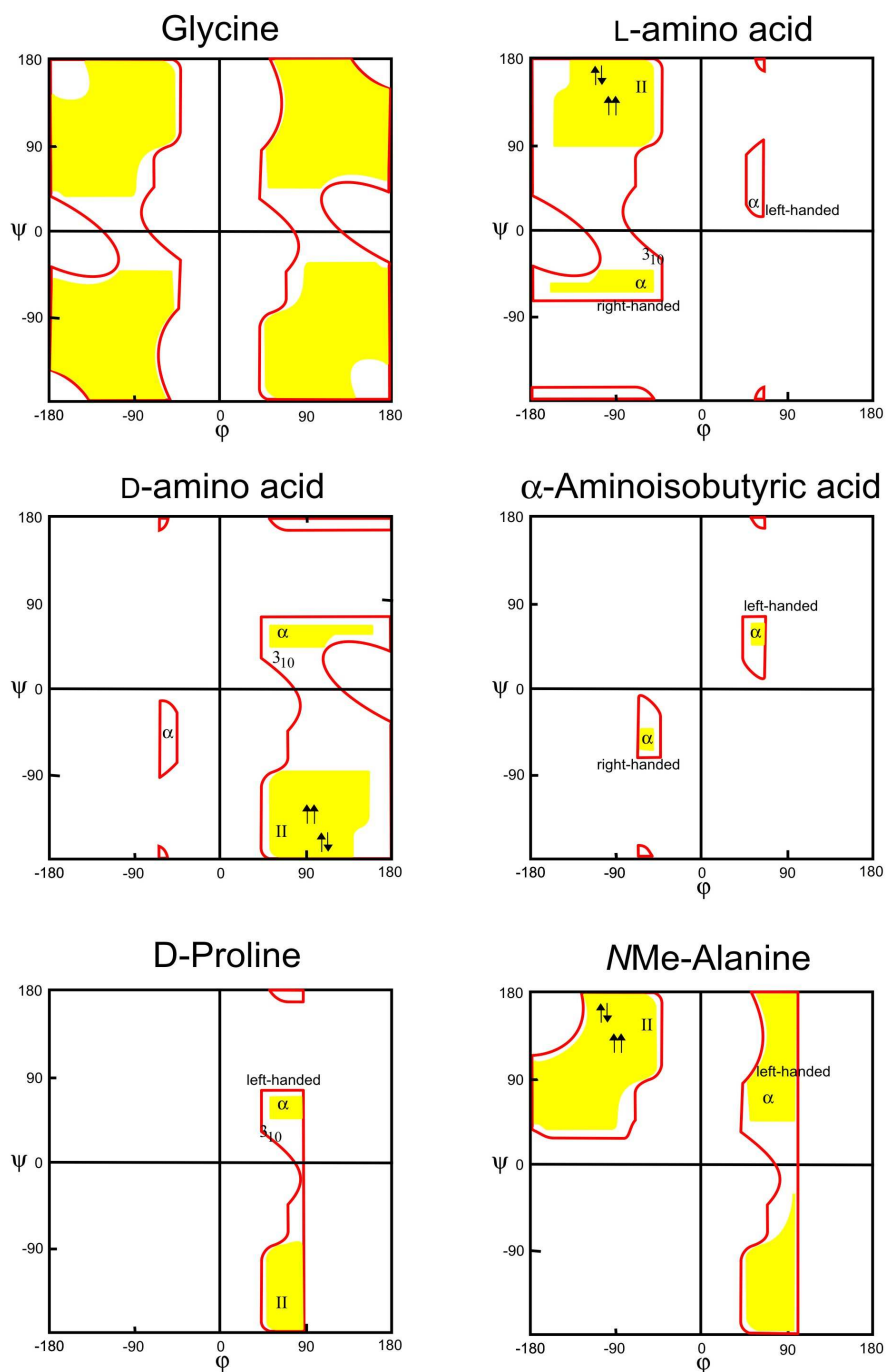

**Figure S1.** Schematic representations of Ramachandran plots showing approximate values of allowed dihedral angles for selected amino acids. The plots were created based on different scientific reports (1-3). Abbreviations:  $\alpha$  -  $\alpha$ -helix,  $3_{10}$  -  $3_{10}$  helix, II - type II  $\beta$ -turn,  $\uparrow\downarrow$  - anti-parallel, and  $\uparrow\uparrow$  - parallel  $\beta$ -sheet.

**Table S1.** Data collection and refinement statistics

|                                                                                                                                                                                                         | [D-ProB8]-insulin                                      | [NMeAlaB8]-insulin <sup>I</sup>                        | [NMeAlaB8]-insulin <sup>II</sup>                   |
|---------------------------------------------------------------------------------------------------------------------------------------------------------------------------------------------------------|--------------------------------------------------------|--------------------------------------------------------|----------------------------------------------------|
| <b>PDB Code</b>                                                                                                                                                                                         | 4CXL                                                   | 4CXN                                                   | 4CY7                                               |
| <b>Data collection</b>                                                                                                                                                                                  |                                                        |                                                        |                                                    |
| Beamline/Detector                                                                                                                                                                                       | DLS*, I04,<br>Pilatus 2M                               | DLS*, I02<br>Pilatus 6M                                | DLS*, I04<br>Pilatus 2M                            |
| Wavelength (Å)                                                                                                                                                                                          | 0.9200                                                 | 0.9795                                                 | 0.9200                                             |
| Space group                                                                                                                                                                                             | I2 <sub>1</sub> 3                                      | I2 <sub>1</sub> 3                                      | P2 <sub>1</sub> 2 <sub>1</sub> 2 <sub>1</sub>      |
| Cell dimensions                                                                                                                                                                                         |                                                        |                                                        |                                                    |
| <i>a</i> , <i>b</i> , <i>c</i> (Å)                                                                                                                                                                      | 78.66 78.66 78.66                                      | 79.17 79.17 79.17                                      | 44.30 46.19 51.76                                  |
| $\alpha$ , $\beta$ , $\gamma$ (°)                                                                                                                                                                       | 90.0 90.0 90.0                                         | 90.0 90.0 90.0                                         | 90.0 90.0 90.0                                     |
| Resolution (Å)                                                                                                                                                                                          | 39.33 - 1.50 (1.54-<br>1.50)                           | 56.0 - 1.70 (1.74-<br>1.70)                            | 32.0 - 1.40 (1.44-1.40)                            |
| $R_{\text{sym}}$                                                                                                                                                                                        | 0.052 (0.656)                                          | 0.041 (0.769)                                          | 0.040 (0.636)                                      |
| $\langle I / \sigma(I) \rangle$                                                                                                                                                                         | 31.8 (5.0)                                             | 36.1 (4.4)                                             | 22.3 (2.7)                                         |
| Completeness (%)                                                                                                                                                                                        | 100.0 (100.0)                                          | 100.0 (100.0)                                          | 98.9 (98.5)                                        |
| Redundancy                                                                                                                                                                                              | 20.0 (20.0)                                            | 19.4 (20.2)                                            | 6.5 (6.6)                                          |
| Wilson B (Å <sup>2</sup> )                                                                                                                                                                              | 29.7                                                   | 30.5                                                   | 14.2                                               |
| <b>Refinement</b>                                                                                                                                                                                       |                                                        |                                                        |                                                    |
| Resolution (Å)                                                                                                                                                                                          | 39.33 - 1.50                                           | 56.0 - 1.70                                            | 32.0 - 1.40                                        |
| No. reflections                                                                                                                                                                                         | 12441                                                  | 8872                                                   | 20063                                              |
| $R_{\text{work}} / R_{\text{free}}$                                                                                                                                                                     | 0.167/0.197                                            | 0.173/0.209                                            | 0.179/0.199                                        |
| No. atoms                                                                                                                                                                                               | 480                                                    | 445                                                    | 976                                                |
| Protein                                                                                                                                                                                                 | 427                                                    | 406                                                    | 816                                                |
| Ligand/ion                                                                                                                                                                                              | 1                                                      | -                                                      | 9                                                  |
| Water                                                                                                                                                                                                   | 57                                                     | 39                                                     | 151                                                |
| <i>B</i> -factors                                                                                                                                                                                       |                                                        |                                                        |                                                    |
| Protein                                                                                                                                                                                                 | 25.7                                                   | 34.2                                                   | 18.3                                               |
| Ligand/ion                                                                                                                                                                                              | 78.6                                                   | -                                                      | 45.4                                               |
| Water                                                                                                                                                                                                   | 44.1                                                   | 46.4                                                   | 29.2                                               |
| R.m.s. deviations                                                                                                                                                                                       |                                                        |                                                        |                                                    |
| Bond lengths (Å)                                                                                                                                                                                        | 0.033                                                  | 0.030                                                  | 0.027                                              |
| Bond angles (°)                                                                                                                                                                                         | 2.784                                                  | 2.175                                                  | 2.537                                              |
| <b>Ramachandran (%)</b>                                                                                                                                                                                 |                                                        |                                                        |                                                    |
| Preferred/Allowed                                                                                                                                                                                       | 97.5/2.5                                               | 95.4/4.6                                               | 93.2/6.8                                           |
| <b>Crystallization</b>                                                                                                                                                                                  |                                                        |                                                        |                                                    |
| insulin: 10 mg/mL<br>in 0.025M HCl,<br>hanging drop<br>method, 1:1 or 1:2<br>protein: well drop<br>ratio, (1-2 $\mu$ L drops)<br>no cryoprotection:<br>direct flash-cooling<br>in liquid N <sub>2</sub> | 40% v/v MPD,<br>0.2 M NaCitrate,<br>0.1M Tris/HCl pH 8 | 40% v/v MPD,<br>0.2 M NaCitrate,<br>0.1M Tris/HCl pH 8 | 0.0375 M Na <sub>2</sub> SO <sub>4</sub><br>pH 4.0 |

\*DLS – Diamond Light Source, Didcot, UK

\*\*Values in parentheses are for highest-resolution shell

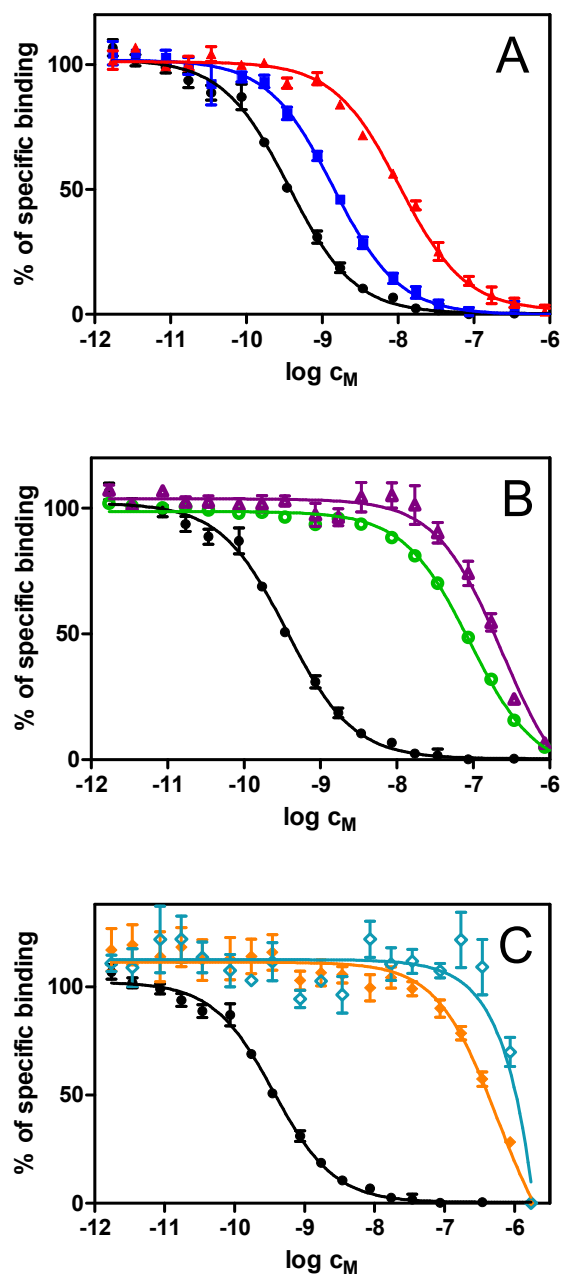

**Figure S2.** Inhibition of binding of human  $[^{125}\text{I}]$ -insulin to IR-A in IM-9 cells by human insulin and insulin analogues. (A) ● – human insulin, ■ – [AibB3]-insulin, ▲ – [AibB5]-insulin; (B) ● – human insulin, ○ – [AibB8]-insulin, △ – [AibB8,LysB28,ProB29]-insulin; (C) ● – human insulin, ◆ – [D-Pro]-insulin, ◇ – [NMeAlaB8]-insulin.  $c_M$  is a molar concentration in mol.l<sup>-1</sup>.

### **Determination of receptor binding affinity for the isoform B of human IR (IR-B)**

Receptor binding affinity was determined according to Frasca et al (4) using mouse embryonic fibroblasts derived from IGF-1R knock-out mice (5) and transfected with the human IR-B isoform. The cells were a kind gift of Prof. Antonino Belfiore (Catanzaro, Italy). The cells were grown at 37°C in a humid atmosphere (5% CO<sub>2</sub>) in 87.6% DMEM containing glucose (4.5 g.l<sup>-1</sup>), 10% fetal bovine serum, L-glutamine (2 mmol.l<sup>-1</sup>), penicillin (100 U.ml<sup>-1</sup>) streptomycin (100 µg.ml<sup>-1</sup>) and puromycin (3 µg.ml<sup>-1</sup>).

For the assay, the cells (about 38,000 per well) were washed twice with the binding buffer (100 mmol.l<sup>-1</sup> HEPES pH 7.6, 100 mmol.l<sup>-1</sup> NaCl, 5 mmol.l<sup>-1</sup> KCl, 1.3 mmol.l<sup>-1</sup> MgSO<sub>4</sub>, 1 mmol.l<sup>-1</sup> EDTA, 10 mmol.l<sup>-1</sup> glucose, 15 mmol.l<sup>-1</sup> sodium acetate and 1% bovine serum albumine). The cells were incubated and stirred with increasing concentrations of insulin/analogue and human [<sup>125</sup>I]moniodotyrosyl-A14-insulin (PerkinElmer Life Science, 2200 Ci.mmol<sup>-1</sup>, 43,000 cpm, 0.043 nM) for 16 h at 5° C in the binding buffer (total volume 250 µl). After incubation, the cells were washed twice with the cold binding buffer and solubilized with 0.1 mol.l<sup>-1</sup> NaOH. The solutions of solubilized cells were counted for cell-associated radioactivity. Each point was determined in duplicates. Binding data were analyzed by GraphPad Prism 5 using a non-linear regression and one-site fitting program, which takes the potential ligand depletion into account. The dissociation constant of human <sup>125</sup>I-insulin was set up to 0.3 nM.

### **Determination of receptor binding affinity for human IGF-1 receptor (IGF-1R)**

Receptor binding affinity for IGF-1R was determined by the same methodology as for receptor binding affinity for IR-B according to Frasca et al (4) but using mouse embryonic fibroblasts derived from IGF-1R knock-out mice (5) and transfected with the human IGF-1R. The cells were a kind gift of Prof. Antonino Belfiore (Catanzaro, Italy).

The cells were grown to about 21,000 per well. As a radiotracer human [<sup>125</sup>I]-IGF-1 was used (PerkinElmer Life Science, 2497 Ci.mmol<sup>-1</sup>, 44,000 cpm, 0.039 nM). The dissociation constant of human <sup>125</sup>I-IGF-1 was set up to 0.2 nM. The concentration of human IGF-1 (Tercica) was determined using an extinction coefficient (ε) 4560 M<sup>-1</sup>.cm<sup>-1</sup> at 280 nm.

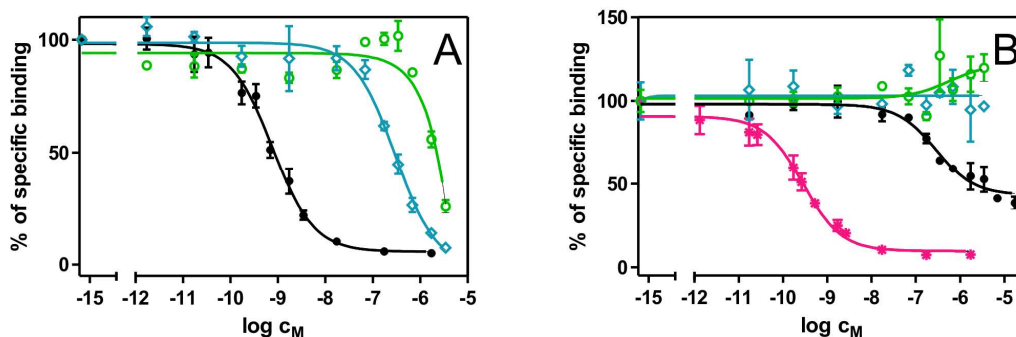

**Figure S3.** (A) Inhibition of binding of human [ $^{125}$ I]-insulin to IR-B in mouse embryonic fibroblasts by human insulin and insulin analogues; ● – human insulin, ○ – [AibB8]-insulin and ◇ – [NMeAlaB8]-insulin. (B) Inhibition of binding of human [ $^{125}$ I]-IGF-1 to IGF-1R in mouse embryonic fibroblasts by human IGF-1 and insulin analogues; \* – human IGF-1, ● – human insulin, ○ – [AibB8]-insulin and ◇ - [NMeAlaB8]-insulin.  $c_M$  is a molar concentration in  $\text{mol.l}^{-1}$ .

**Table S2.** Values of  $K_d$  and relative binding affinities of human insulin, human IGF-1 and insulin analogues to the isoform B (IR-B) of human IR or to human IGF-1R in membranes of mouse embryonic fibroblasts.

| Analogue           | IR-B                                |                          | IGF-1R                              |                          |
|--------------------|-------------------------------------|--------------------------|-------------------------------------|--------------------------|
|                    | $K_d \pm \text{S.D.}^a$<br>[nM] (n) | Potency <sup>b</sup> [%] | $K_d \pm \text{S.D.}^a$<br>[nM] (n) | Potency <sup>b</sup> [%] |
| Human insulin      | $0.670 \pm 0.167$                   | $100 \pm 25$             | $292 \pm 54$                        | $0.08 \pm 0.01$          |
| Human IGF-1        | n.d. <sup>c</sup>                   | n.d. <sup>c</sup>        | $0.240 \pm 0.104$                   | $100 \pm 43$             |
| [AibB8]-insulin    | $248 \pm 59$ (3)                    | 0.27                     | >2000 (2)                           | < 0.01                   |
| [NMeAlaB8]-insulin | >1500 (3)                           | < 0.05                   | >2000 (2)                           | < 0.01                   |

<sup>a</sup>Each value represents the mean  $\pm$  S.D. of multiple determinations (n).

<sup>b</sup>Relative receptor binding affinity (potency) is defined as  $(K_d \text{ of human insulin or IGF-1}/K_d \text{ of analogue}) \times 100$ .

<sup>c</sup>n.d., not determined.

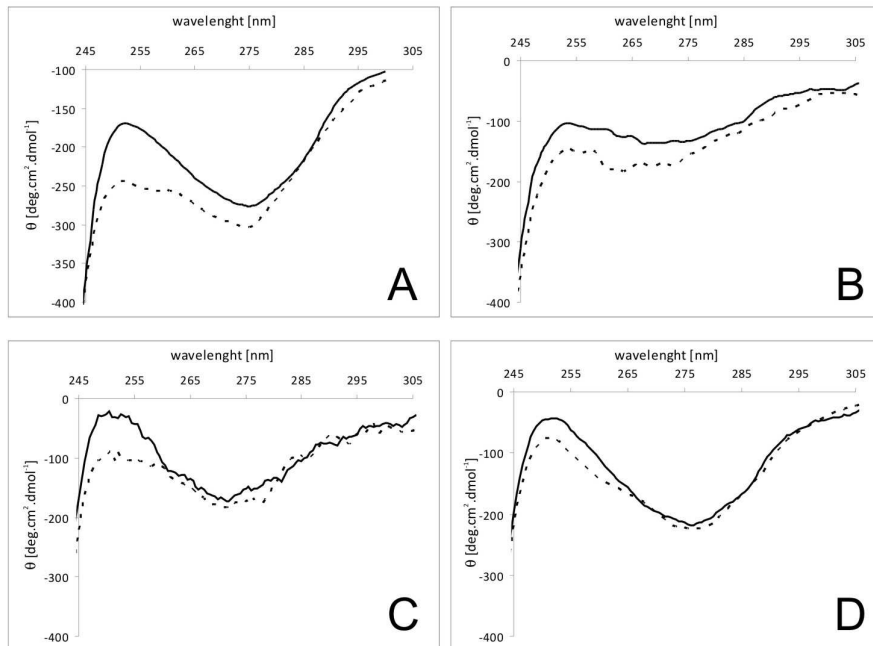

**Figure S4.** Near-UV CD spectra of insulin analogues in the absence (solid line) and the presence (dashed line) of phenol; (A) human insulin, (B) [AibB8]-insulin, (C) [D-ProB8]-insulin, (D) [NMeAlaB8]-insulin.

**Table S3.** Secondary structures content (in %) in human insulin or insulin analogues with or without phenol calculated from CD spectra (200-260 nm) using CD Spectra Deconvolution software version 2.11.developed in 2001 by Dr. Gerald Böhm, from Institut für Biotechnologie Martin-Luther-Universität Halle-Wittenberg in Germany.

|              | <b>Insulin (%)</b> | <b>Insulin + phenol (%)</b> |              | <b>[AibB8]-insulin (%)</b> | <b>[AibB8]-insulin + phenol (%)</b> |
|--------------|--------------------|-----------------------------|--------------|----------------------------|-------------------------------------|
| Helix        | 22.2               | 30.5                        | Helix        | 26.9                       | 30.2                                |
| Antiparallel | 18.7               | 14.0                        | Antiparallel | 11.0                       | 8.9                                 |
| Parallel     | 5.9                | 6.0                         | Parallel     | 10.4                       | 10.3                                |
| Beta-Turn    | 16.7               | 14.9                        | Beta-Turn    | 17.5                       | 17.5                                |
| Random Coil  | 32.0               | 29.5                        | Random Coil  | 36.2                       | 33.3                                |
| Total Sum    | 95.4               | 95.0                        | Total Sum    | 102.0                      | 100.2                               |

|              | <b>[AibB3]-insulin (%)</b> | <b>[AibB3]-insulin + phenol (%)</b> |              | <b>[DProB8]-insulin (%)</b> | <b>[DProB8]-insulin + phenol (%)</b> |
|--------------|----------------------------|-------------------------------------|--------------|-----------------------------|--------------------------------------|
| Helix        | 26.5                       | 27.0                                | Helix        | 22.2                        | 27.1                                 |
| Antiparallel | 10.1                       | 10.0                                | Antiparallel | 18.9                        | 15.9                                 |
| Parallel     | 9.5                        | 9.3                                 | Parallel     | 5.9                         | 6.0                                  |
| Beta-Turn    | 17.4                       | 17.4                                | Beta-Turn    | 16.9                        | 15.8                                 |
| Random Coil  | 36.0                       | 35.2                                | Random Coil  | 32.1                        | 30.7                                 |
| Total Sum    | 99.5                       | 98.9                                | Total Sum    | 96.1                        | 95.5                                 |

|              | <b>[NMeAlaB8]-insulin (%)</b> | <b>[NMeAlaB8]-insulin + phenol (%)</b> |
|--------------|-------------------------------|----------------------------------------|
| Helix        | 26.0                          | 26.2                                   |
| Antiparallel | 16.4                          | 16.2                                   |
| Parallel     | 6.0                           | 5.9                                    |
| Beta-Turn    | 16.1                          | 16.1                                   |
| Random Coil  | 31.0                          | 31.0                                   |
| Total Sum    | 95.5                          | 95.4                                   |



**Table S4.** NMR constraints and structural statistics for [AibB8,LysB28,ProB29]-insulin

---

|                                                                                                              |                   |
|--------------------------------------------------------------------------------------------------------------|-------------------|
| <i>Non-redundant distance constrains</i>                                                                     |                   |
| Total number of NOE constraints                                                                              | 488               |
| Short-range NOEs ( $i, i+1$ )                                                                                | 329               |
| Medium-range NOEs ( $i, i > 1 \ i \leq 4$ )                                                                  | 80                |
| Long-range NOEs ( $i, i \geq 5$ )                                                                            | 79                |
| <i>Distance constraints violations</i>                                                                       |                   |
| In six or more structures $> 0.2 \text{ \AA}$                                                                | 0                 |
| In six or more structures $> 0.3 \text{ \AA}$                                                                | 0                 |
| r.m.s. ( $\text{\AA}$ )                                                                                      | $0.003 \pm 0.002$ |
| <hr/>                                                                                                        |                   |
| <i>Ramachandran plot</i>                                                                                     |                   |
| Residues within the most favored region                                                                      | 84.2%             |
| Residues within the additionally allowed region                                                              | 12.5%             |
| Residues within generously allowed region                                                                    | 2.6%              |
| Residues within the disallowed region                                                                        | 0.7%              |
| <hr/>                                                                                                        |                   |
| <i>Cing ROG scores</i>                                                                                       |                   |
| ROG (%)                                                                                                      | 16/16/69          |
| <hr/>                                                                                                        |                   |
| <i>r.m.s.d. to the mean structure</i><br><i>(residues chain A<sub>1-21</sub> and chain B<sub>1-23</sub>)</i> |                   |
| Backbone heavy atom ( $\text{\AA}$ )                                                                         | $1.49 \pm 0.34$   |
| All heavy atom ( $\text{\AA}$ )                                                                              | $2.21 \pm 0.15$   |

---

**Table S5.** Relative affinities of some insulin analogues with modification at the N-terminus of the B chain reported in literature.

| analogue                          | relative affinity (%) | reference   |
|-----------------------------------|-----------------------|-------------|
| insulin                           | 100                   |             |
| [AlaB1]-insulin                   | 79                    | (6)         |
| [AlaB2]-insulin                   | 110                   | (6)         |
| [AlaB3]-insulin                   | 134                   | (6)         |
| [ProB3]-insulin                   | 54                    | (7)         |
| [SerB3]-insulin                   | 97                    | (7)         |
| [AlaB4]-insulin                   | 54                    | (6)         |
| [Cys(B4-A10),desB30]-insulin      | 132                   | (8)         |
| [AlaB5]-insulin                   | 31                    | (9)         |
| [ArgB5]-insulin                   | 40                    | (10)        |
| [ThrB5]-insulin                   | 20-24                 | (7, 11)     |
| [AsnB5]-insulin                   | 46                    | (12)        |
| [AspB5]-insulin                   | 0.4                   | (12)        |
| [AlaB5]DKP-insulin <sup>1</sup>   | 129                   | (13)        |
| [AlaB6]-insulin                   | 1.4                   | (6, 14)     |
| [GlyB6]-insulin                   | 0.052                 | (14)        |
| [MetB6]-insulin                   | 15                    | (14)        |
| [ValB6]-insulin                   | 3.3                   | (14)        |
| [PheB6]-insulin                   | 10                    | (14)        |
| [AlaB8]-insulin                   | 1.0 - 3.0             | (6, 15, 16) |
| [D-AlaB8]-insulin                 | 0.11                  | (15, 16)    |
| [AlaB8]DKP-insulin <sup>1</sup>   | 3.2 - 3.6             | (15, 16)    |
| [D-AlaB8]DKP-insulin <sup>1</sup> | 0.17                  | (15, 16)    |
| [SerB8]DKP-insulin <sup>1</sup>   | 90                    | (15, 17)    |
| [D-SerB8]DKP-insulin <sup>1</sup> | 1.1                   | (15, 17)    |
| [D-ArgB8]DKP-insulin <sup>1</sup> | 0.05                  | (15)        |
| [SerB8,desB30]-insulin            | 23                    | (18)        |
| [ThrB8,desB30]-insulin            | < 0.2                 | (18)        |
| [LeuB8,desB30]-insulin            | < 0.2                 | (18)        |
| [D-LysB8]-insulin                 | < 0.5                 | (19)        |
| [D-TrpB8]-insulin                 | < 0.6                 | (19)        |
| [GluB9]-insulin                   | 21                    | (20)        |
| [AlaB9]-insulin                   | 80                    | (6)         |

<sup>1</sup>DKP-insulin, monomeric insulin analogue containing three substitutions in the B-chain (AspB10, LysB28, ProB29). Relative affinity of DKP-insulin is 160% (15)

## References

1. Mahalakshmi, R., Balaram, P. (2006) The use of D-amino acids in peptide design, in *D-Amino acids: A new frontier in amino acid and protein research* (Konno, R., Ed.), pp 415–430.
2. Karle, I. L., and Balaram, P. (1990) Structural characteristics of alpha-helical peptide molecules containing Aib residues, *Biochemistry* 29, 6747-6756.
3. Durani, S. (2008) Protein design with L- and D-alpha-amino acid structures as the alphabet, *Acc. Chem. Res.* 41, 1301-1308.
4. Frasca, F., Pandini, G., Scalia, P., Sciacca, L., Mineo, R., Costantino, A., Goldfine, I. D., Belfiore, A., and Vigneri, R. (1999) Insulin receptor isoform A, a newly recognized, high-affinity insulin-like growth factor II receptor in fetal and cancer cells, *Mol. Cell Biol.* 19, 3278-3288.
5. Sell, C., Dumenil, G., Deveaud, C., Miura, M., Coppola, D., Deangelis, T., Rubin, R., Efstratiadis, A., and Baserga, R. (1994) Effect of a null mutation of the insulin-like growth-factor-I receptor gene on growth and transformation of mouse embryo fibroblasts, *Mol. Cell Biol.* 14, 3604-3612.
6. Kristensen, C., Kjeldsen, T., Wiberg, F. C., Schaffer, L., Hach, M., Havelund, S., Bass, J., Steiner, D. F., and Andersen, A. S. (1997) Alanine scanning mutagenesis of insulin, *J. Biol. Chem.* 272, 12978-12983.
7. Gauguin, L., Klaproth, B., Sajid, W., Andersen, A. S., McNeil, K. A., Forbes, B. E., and De Meyts, P. (2008) Structural basis for the lower affinity of the insulin-like growth factors for the insulin receptor, *J. Biol. Chem.* 283, 2604-2613.
8. Vinther, T. N., Norrman, M., Ribel, U., Huus, K., Schlein, M., Steensgaard, D. B., Pedersen, T. A., Pettersson, I., Ludvigsen, S., Kjeldsen, T., Jensen, K. J., and Hubalek, F. (2013) Insulin analog with additional disulfide bond has increased stability and preserved activity, *Protein Sci.* 22, 296-305.
9. Marki, F., de Gasparo, M., Eisler, K., Kamber, B., Riniker, B., Rittel, W., and Sieber, P. (1979) Synthesis and biological activity of seventeen analogues of human insulin, *Hoppe-Seyler's Z. Physiol. Chem.* 360, 1619-1632.
10. Wan, Z. L., Huang, K., Hu, S. Q., Whittaker, J., and Weiss, M. A. (2008) The structure of a mutant insulin uncouples receptor binding from protein allostery - An electrostatic block to the TR transition, *J. Biol. Chem.* 283, 21198-21210.

11. Sohma, Y., Hua, Q. X., Liu, M., Phillips, N. B., Hu, S. Q., Whittaker, J., Whittaker, L. J., Ng, A., Roberts, C. T., Arvan, P., Kent, S. B. H., and Weiss, M. A. (2010) Contribution of residue B5 to the folding and function of insulin and IGF-I, *J. Biol. Chem.* *285*, 5040-5055.
12. Burke, G. T., Hu, S. Q., Ohta, N., Schwartz, G. P., Zong, L., and Katsoyannis, P. G. (1990) Superactive insulins, *Biochem. Biophys. Res. Commun.* *173*, 982-987.
13. Hua, Q. X., Liu, M., Hu, S. Q., Jia, W. H., Arvan, P., and Weiss, M. A. (2006) A conserved histidine in insulin is required for the foldability of human proinsulin - Structure and function of an Ala(B5) analog, *J. Biol. Chem.* *281*, 24889-24899.
14. Nakagawa, S. H., and Tager, H. S. (1991) Implications of invariant residue LeuB6 in insulin-receptor interactions, *J. Biol. Chem.* *266*, 11502-11509.
15. Nakagawa, S. H., Zhao, M., Hua, Q. X., Hu, S. Q., Wan, Z. L., Jia, W., and Weiss, M. A. (2005) Chiral mutagenesis of insulin. Foldability and function are inversely regulated by a stereospecific switch in the B chain, *Biochemistry* *44*, 4984-4999.
16. Nakagawa, S. H., Zhao, M., Hua, Q. X., and Weiss, M. A. (1997) The importance of residue B8 in insulin activity, structure and folding, in *Proceedings of the 15th American Peptide Symposium*, (Tam, J. P., and Kaumaya, P. T. P., Eds.), pp 471-472.
17. Hua, Q. X., Nakagawa, S., Hu, S. Q., Jia, W., Wang, S., and Weiss, M. A. (2006) Toward the active conformation of insulin: stereospecific modulation of a structural switch in the B chain, *J. Biol. Chem.* *281*, 24900-24909.
18. Guo, Z. Y., Zhang, Z., Jia, X. Y., Tang, Y. H., and Feng, Y. M. (2005) Mutational analysis of the absolutely conserved B8Gly: Consequence on foldability and activity of insulin, *Acta Biochim. Biophys. Sin.* *37*, 673-679.
19. Zhao, M., Nakagawa, S. H., Hua, Q. X., and Weiss, M. A. (1997) Exploring the foldability and function of insulin by combinatorial peptide chemistry, in *Proceedings of the 15th American Peptide Symposium*, (Tam, J. P., and Kaumaya, P. T. P., Eds.), pp 369-371.
20. Yao, Z. P., Zeng, Z. H., Li, H. M., Zhang, Y., Feng, Y. M., and Wang, D. C. (1999) Structure of an insulin dimer in an orthorhombic crystal: the structure analysis of a human insulin mutant (B9 Ser → Glu), *Acta Crystallogr., Sect. D: Biol. Crystallogr.* *55*, 1524-1532.
